# Supplementary material
Source: PubMed Central journal article supplement (PMC10307875)

**Fig. 4A**

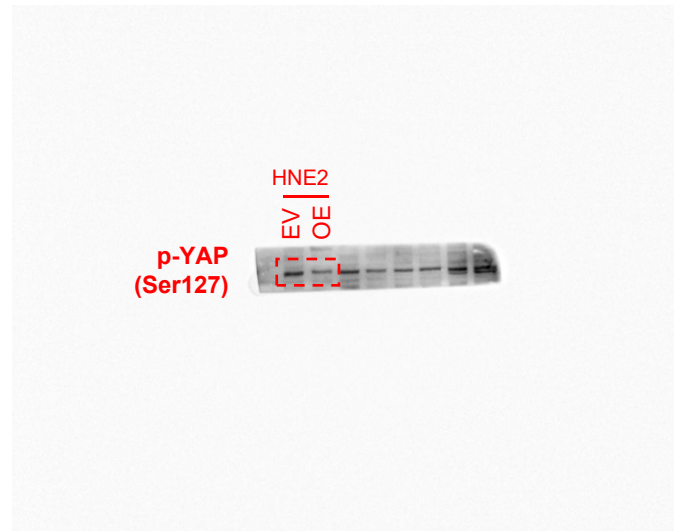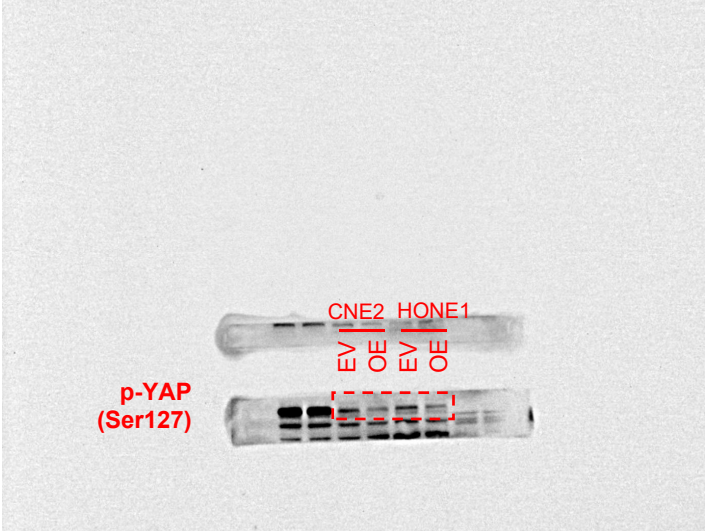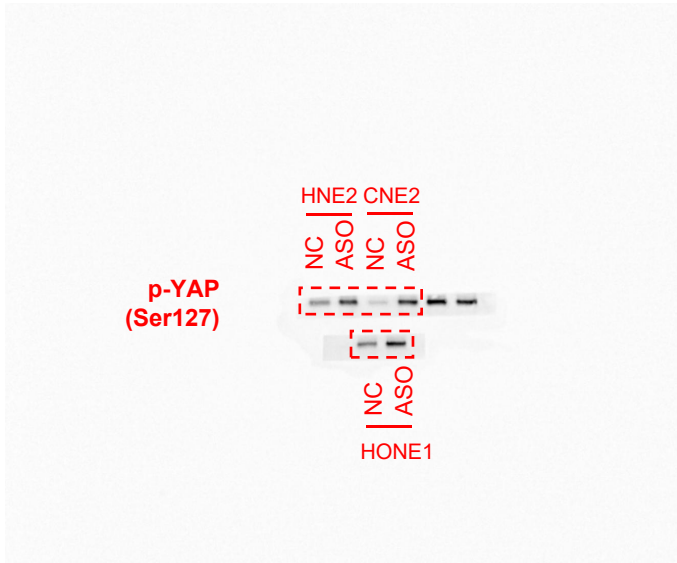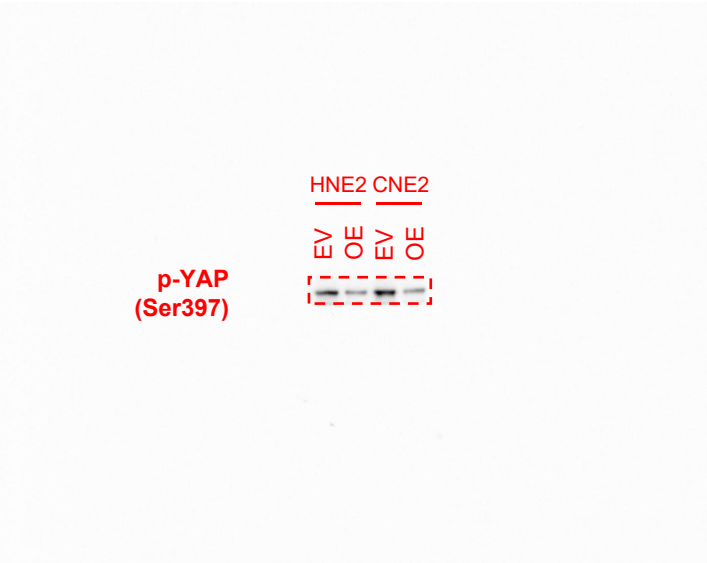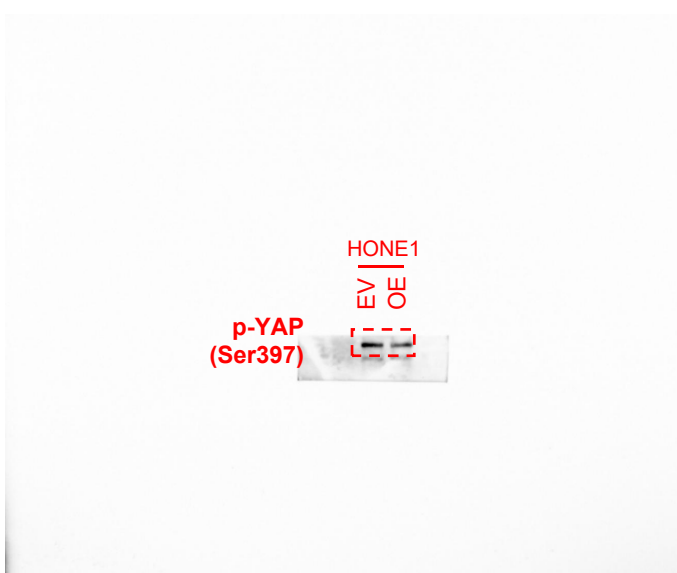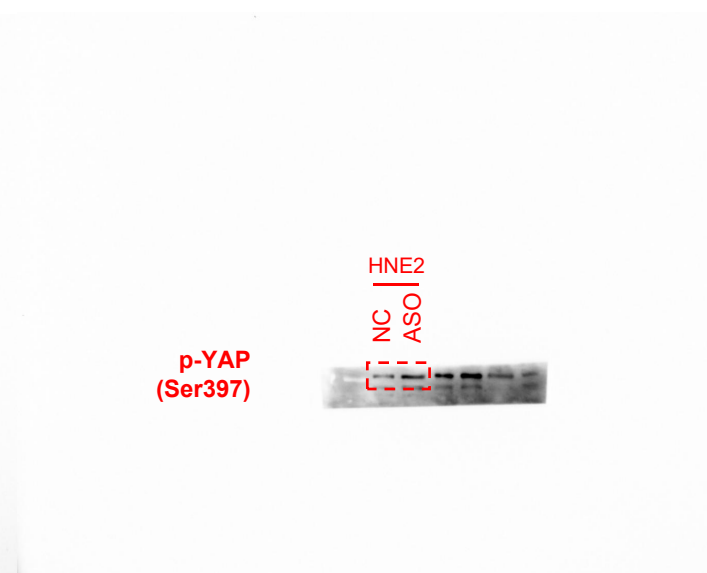

**Fig. 4A**

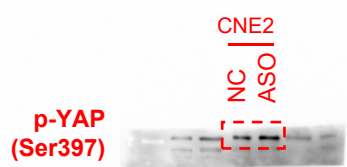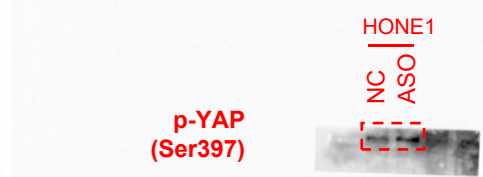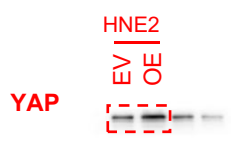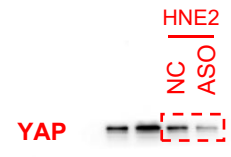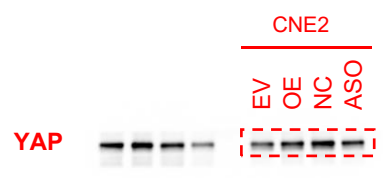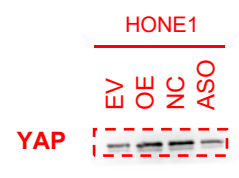

**Fig. 4A**

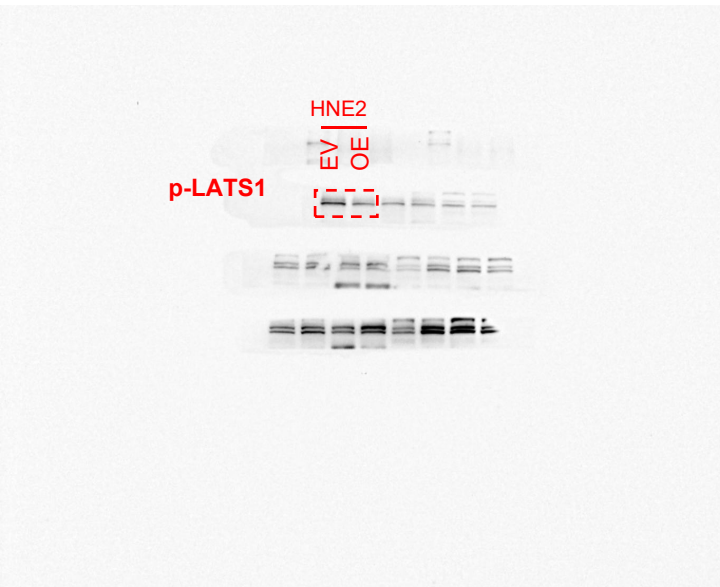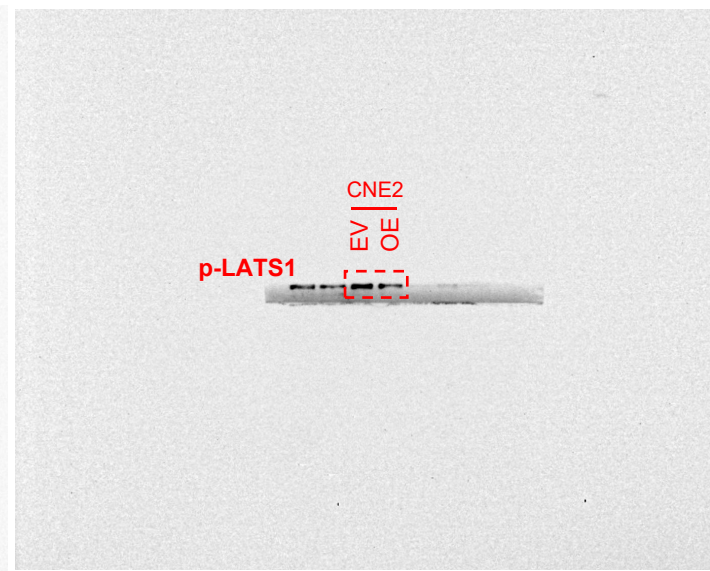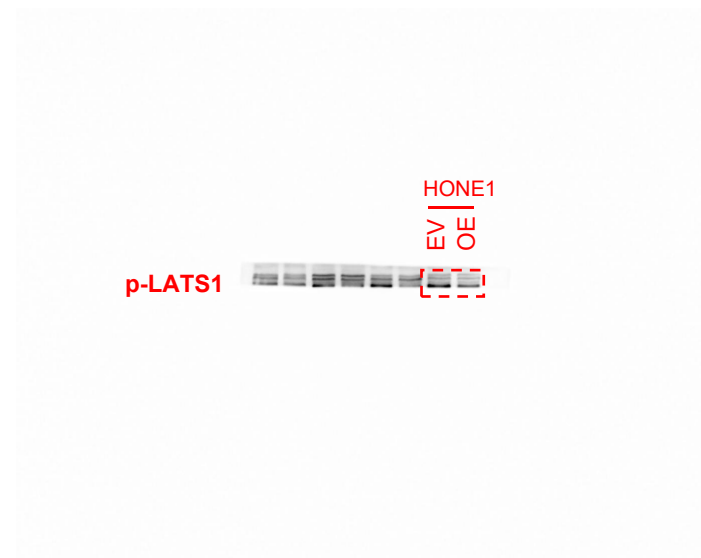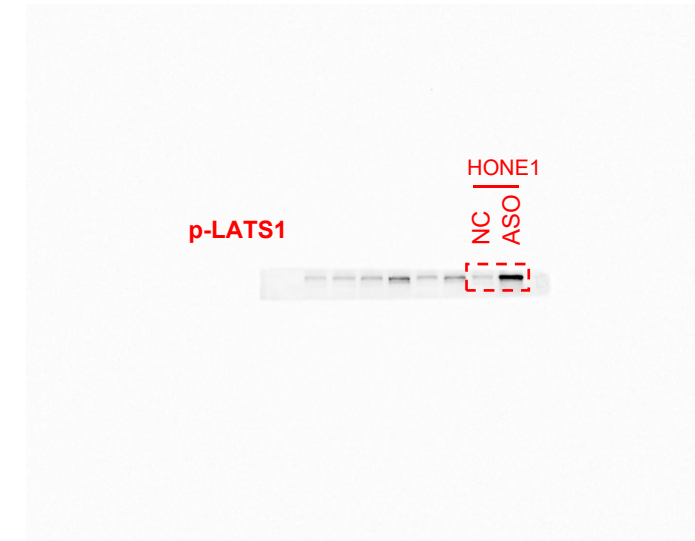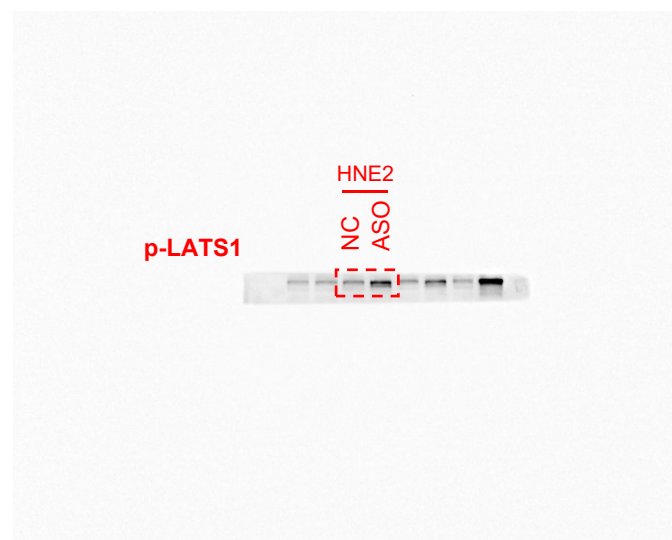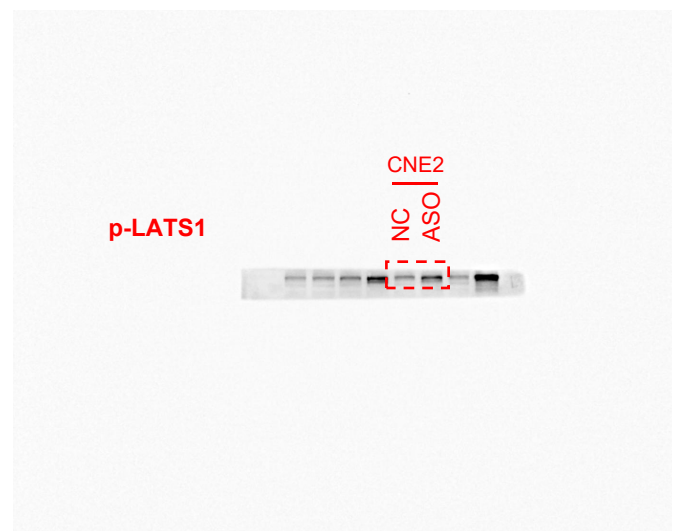

**Fig. 4A**

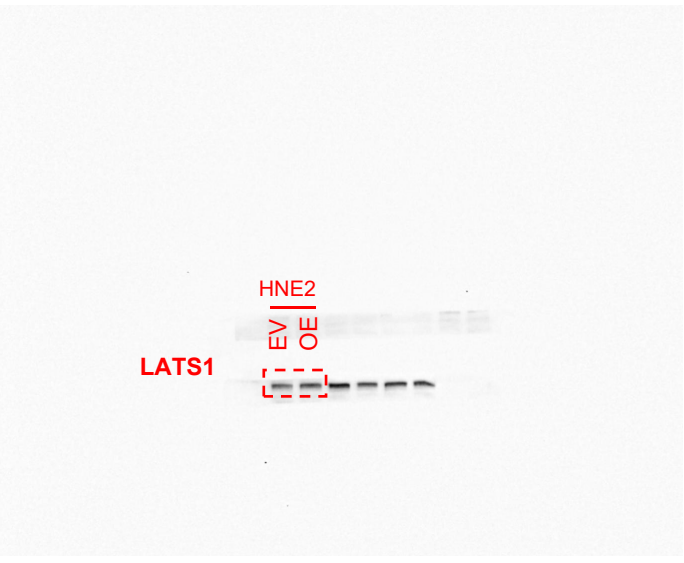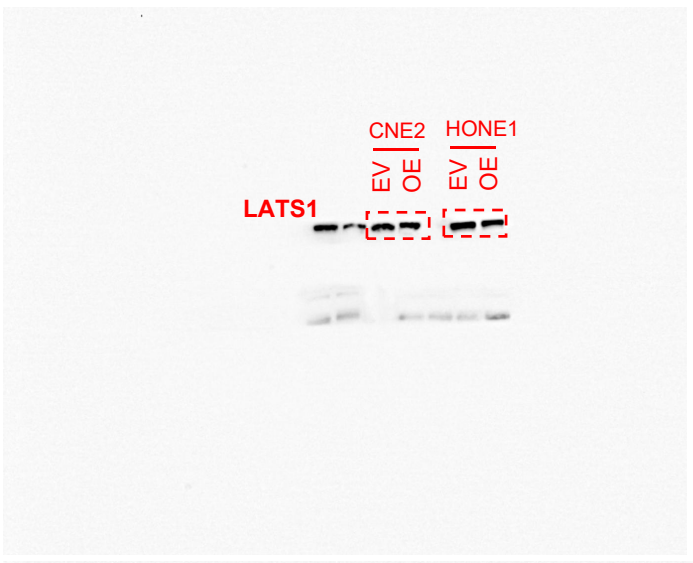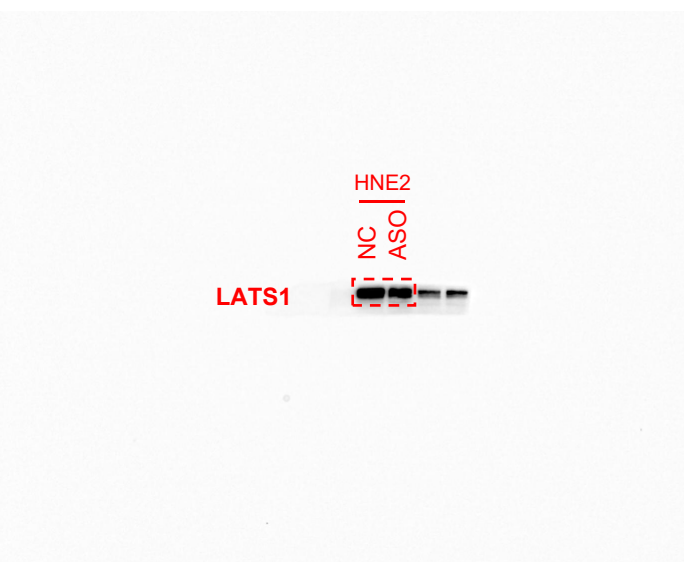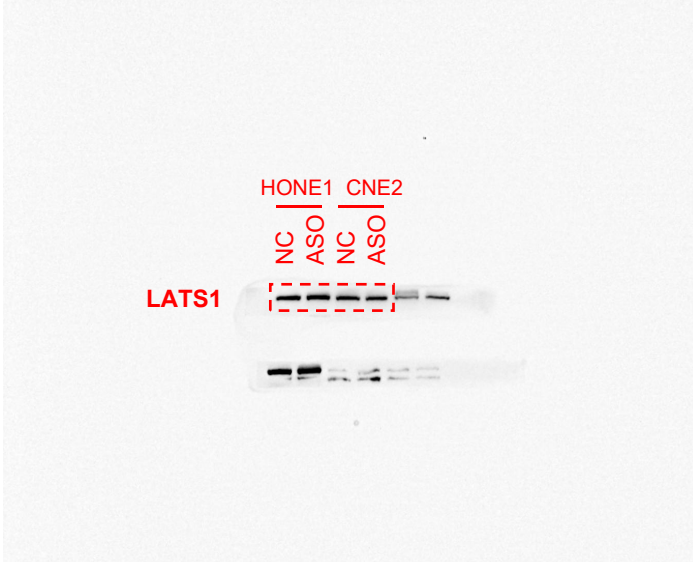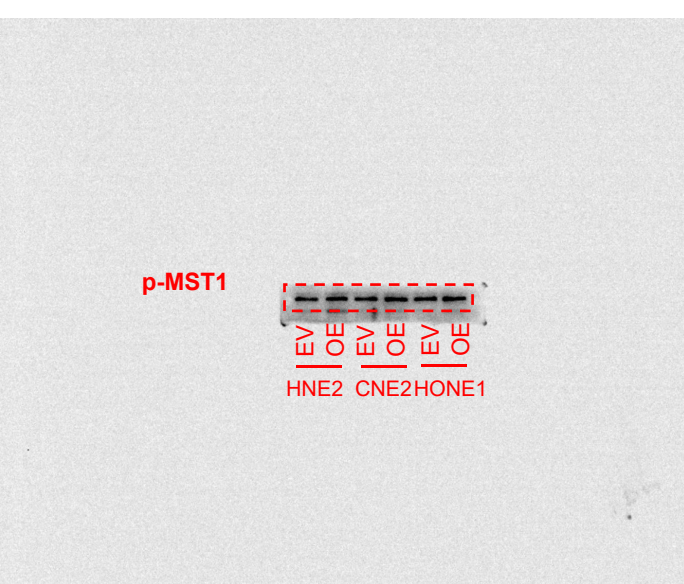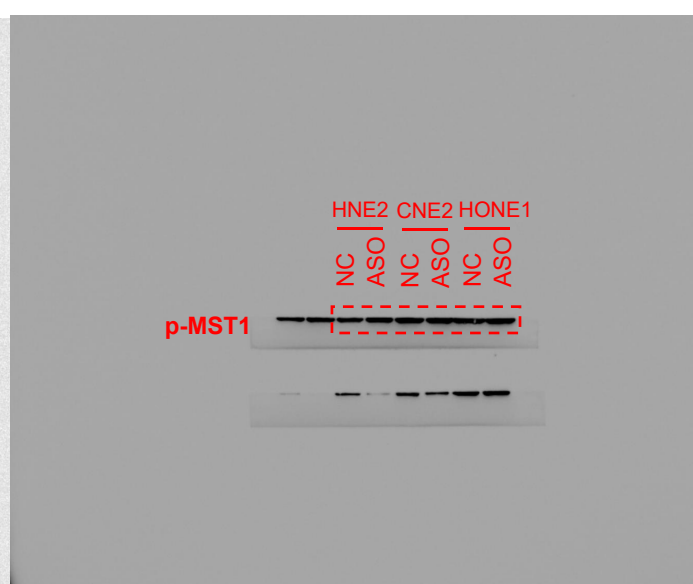



**Fig. 4A**

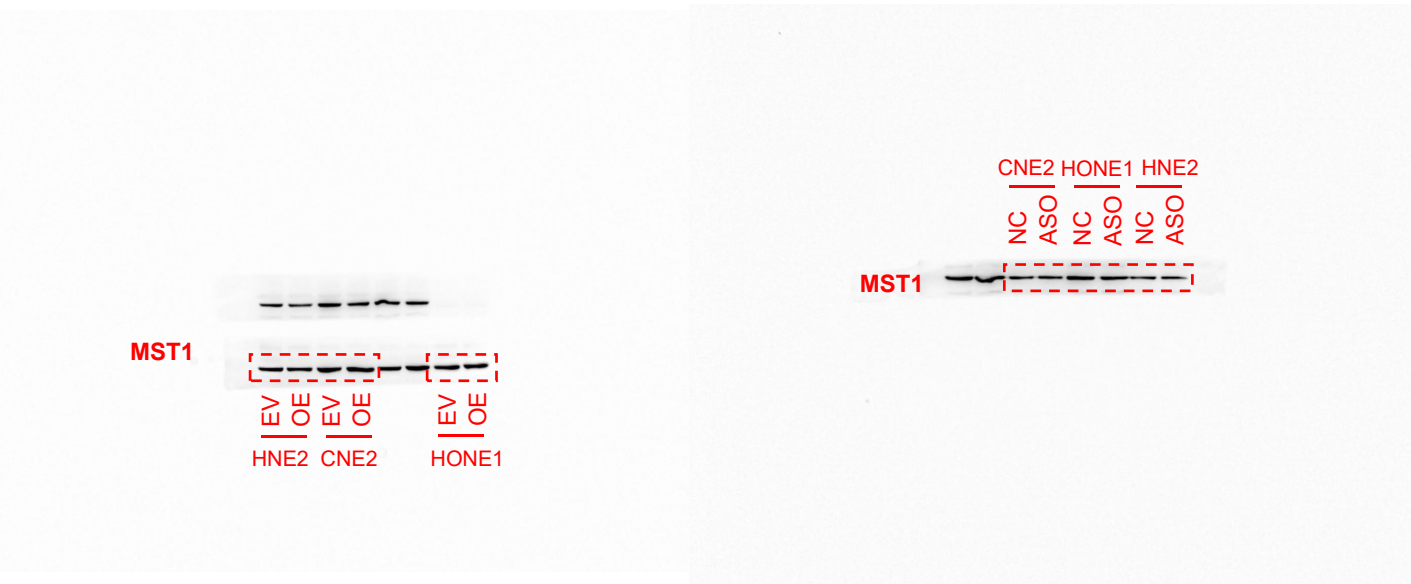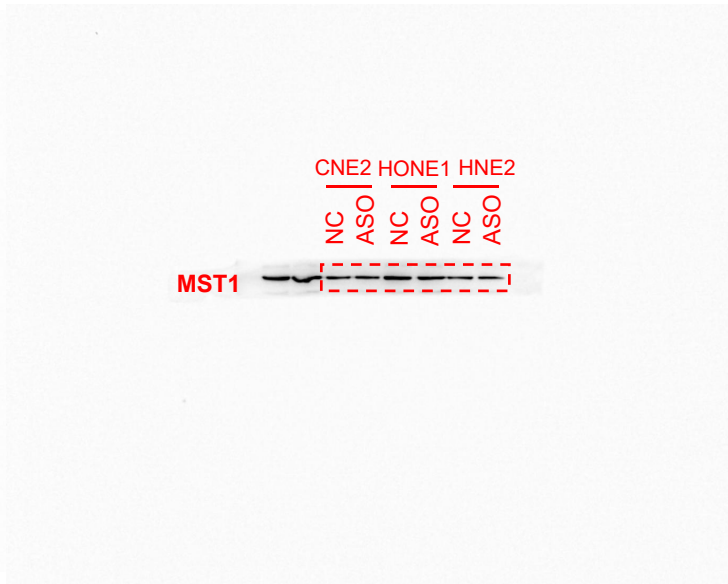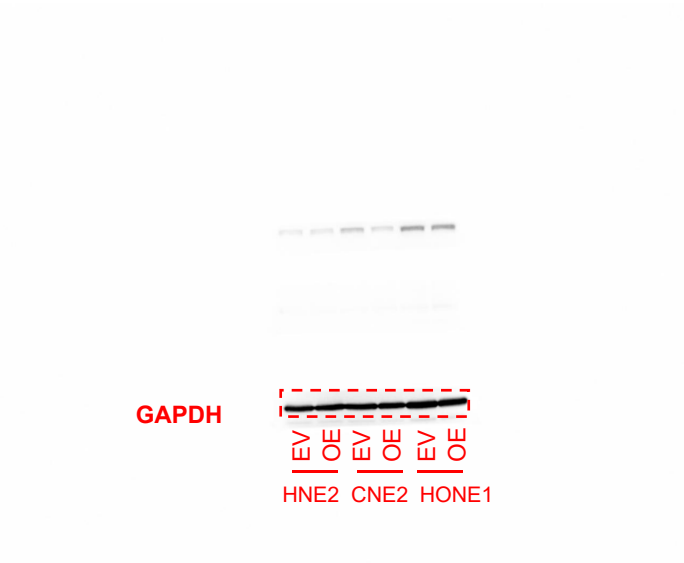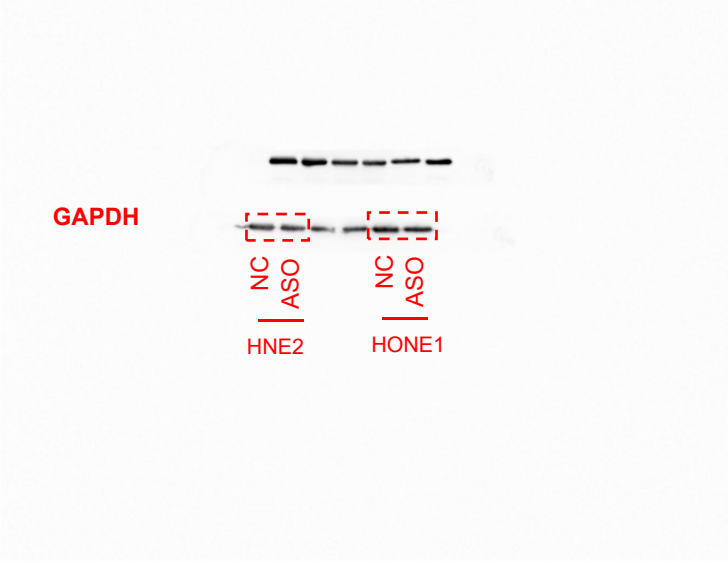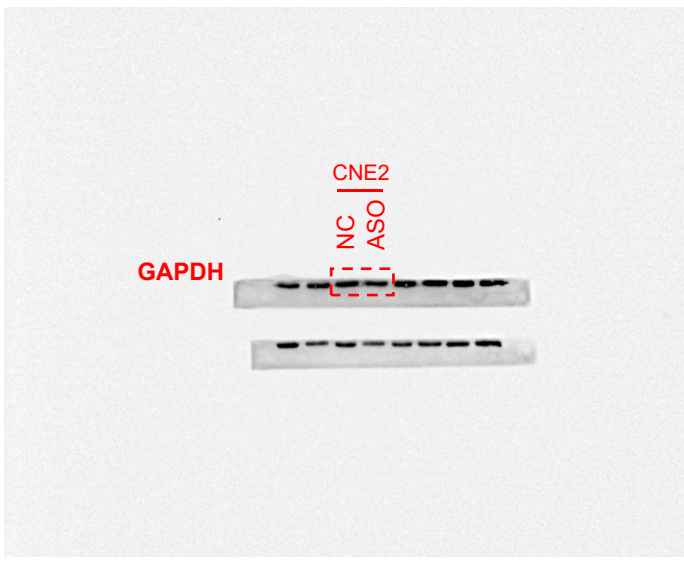

**Fig. 4B**

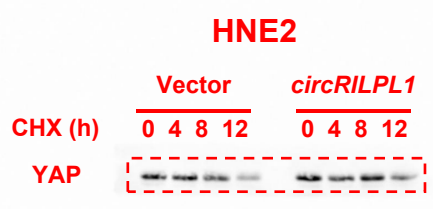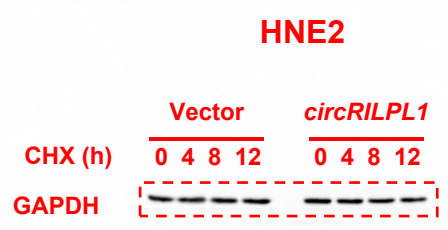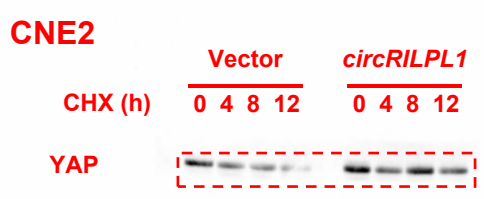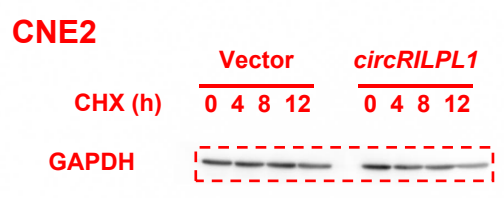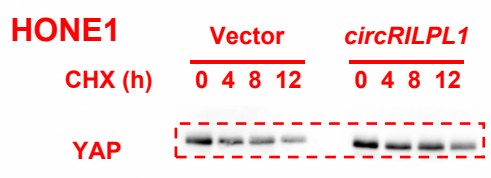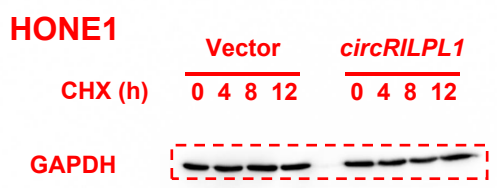

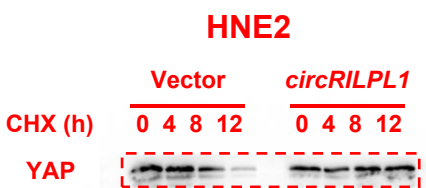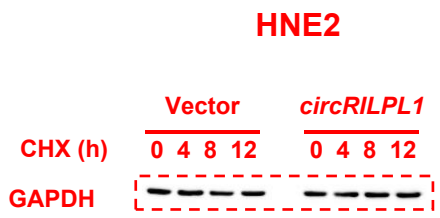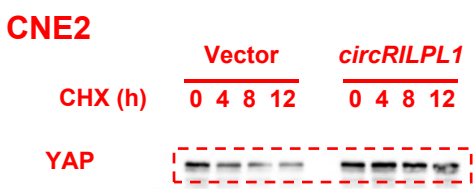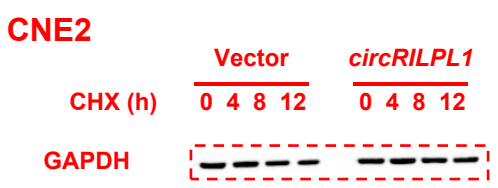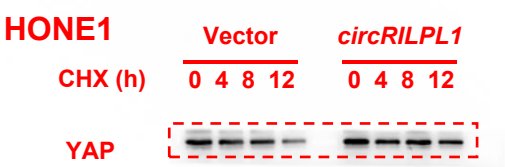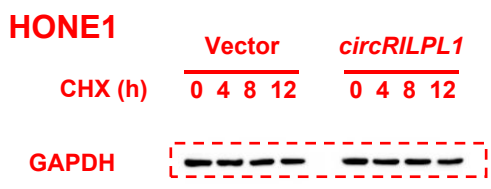

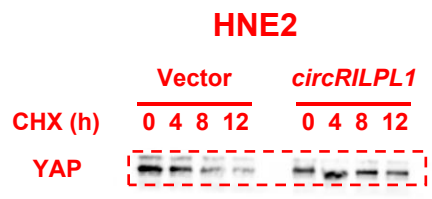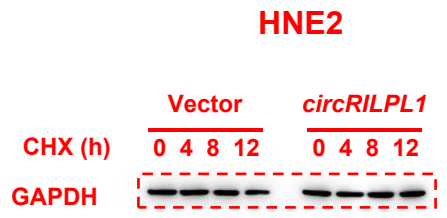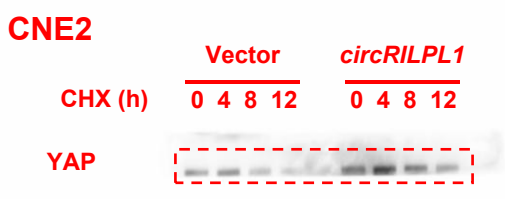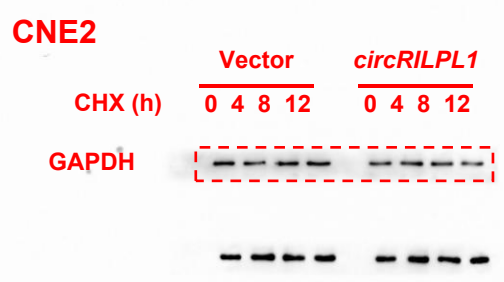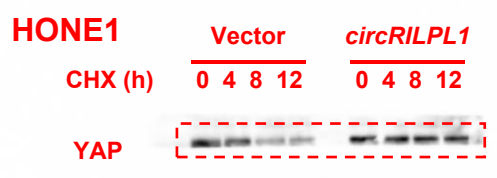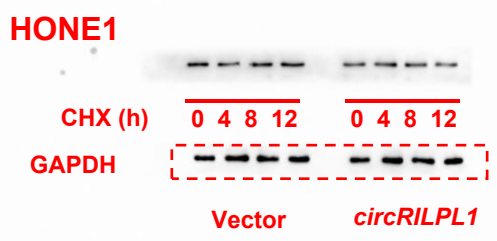



**Fig. 4C**

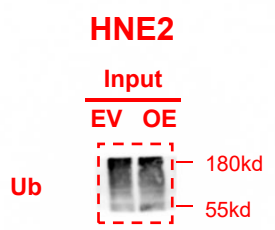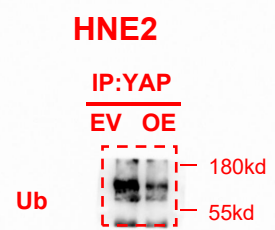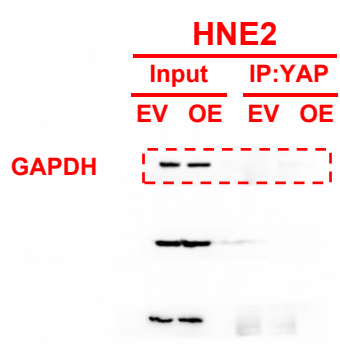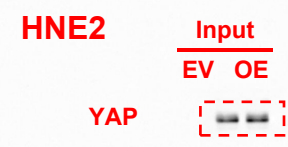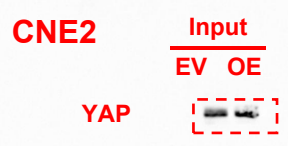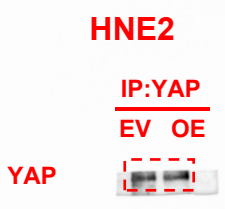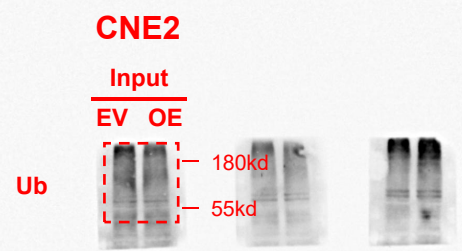

**Fig. 4C**

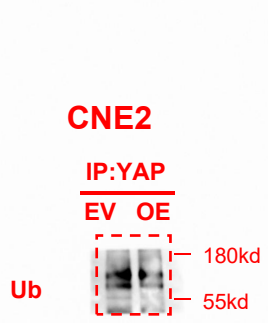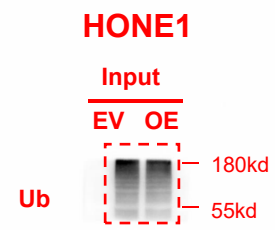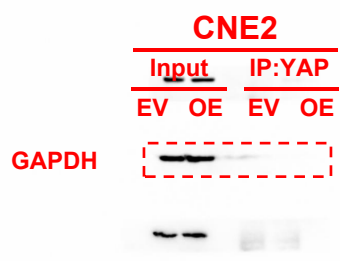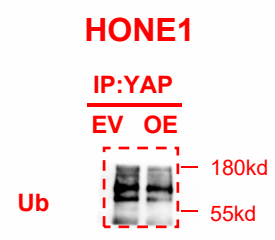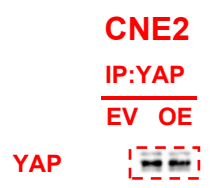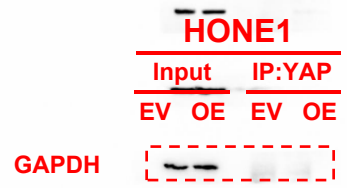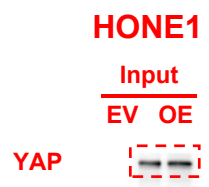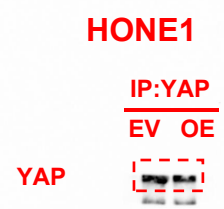

**Fig. 4D**

**HNE2**

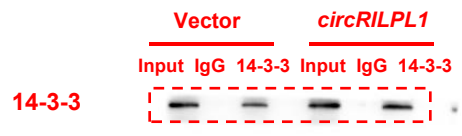

**HNE2**

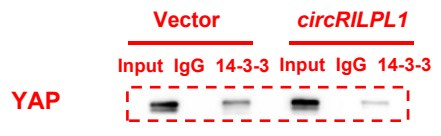

**HNE2**

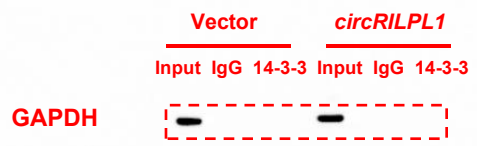

**Fig. 4D**

**CNE2**

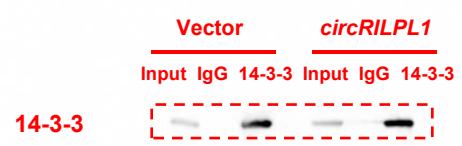

**CNE2**

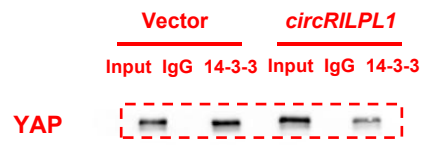

**CNE2**

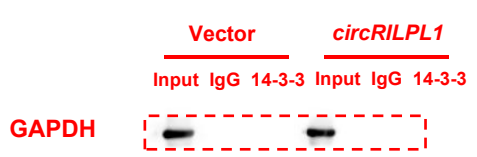



**Fig. 4D**

**HONE1**

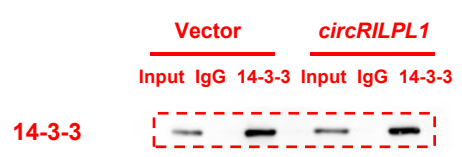

**HONE1**

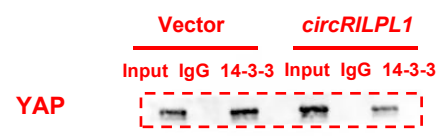

**HONE1**

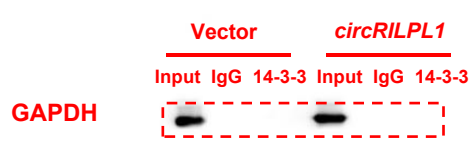

**Fig. 4E**

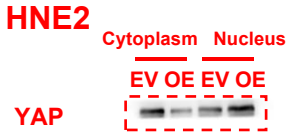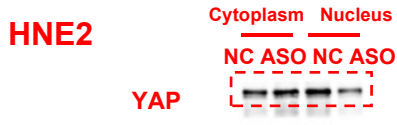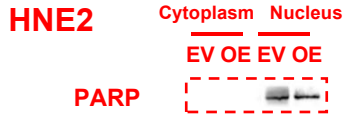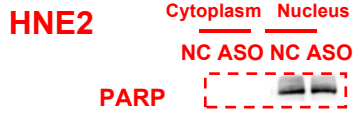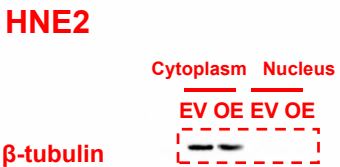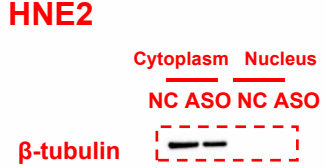

**Fig. 4E**

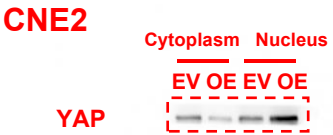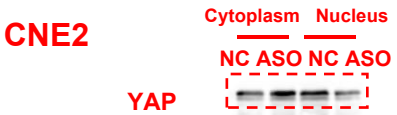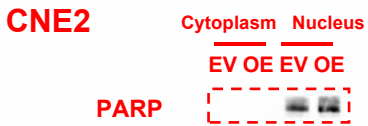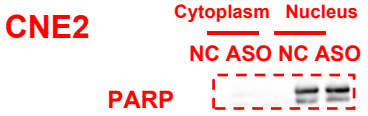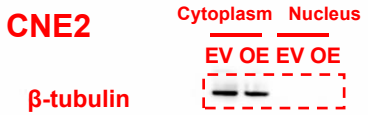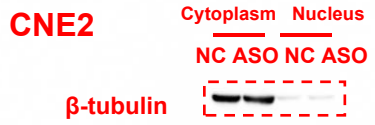

**Fig. 4E**

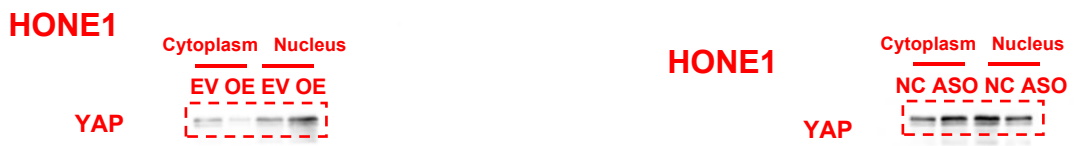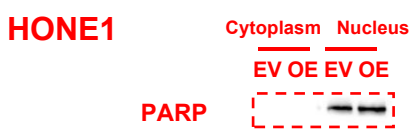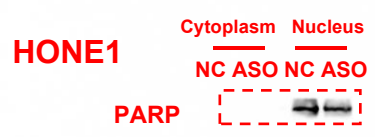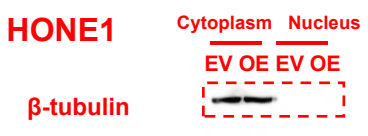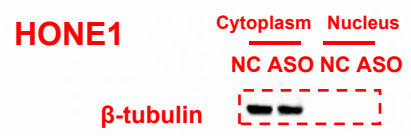



**Fig. S5D**

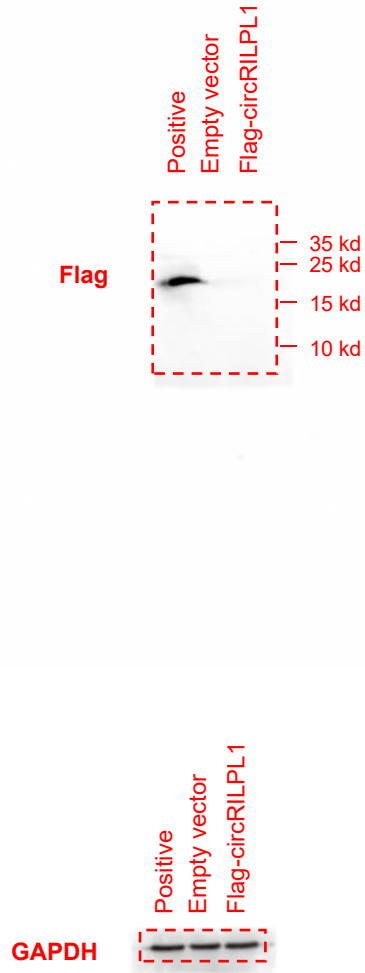

**Fig. S7A**

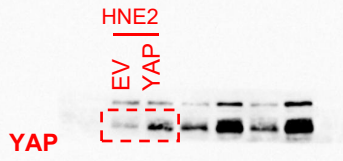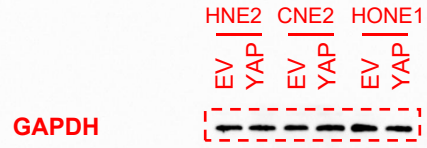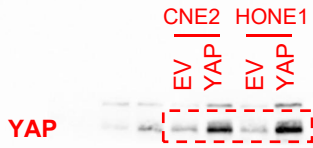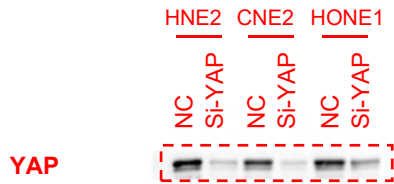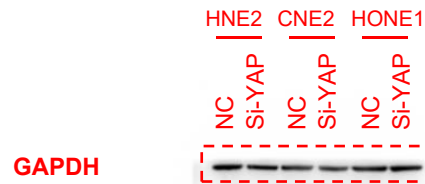

**Fig. 6B**

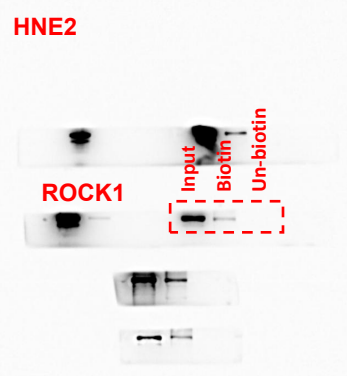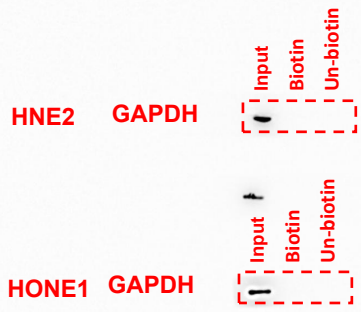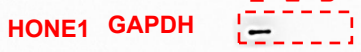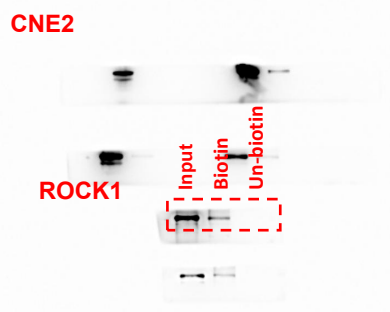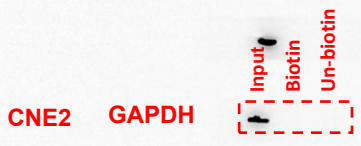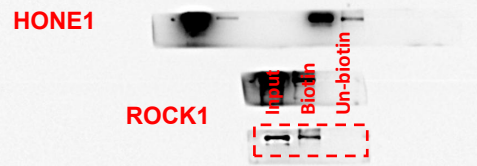

**Fig. 6E**

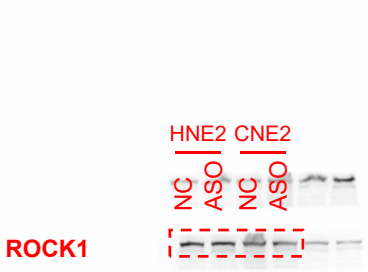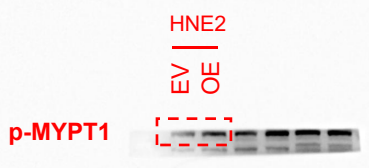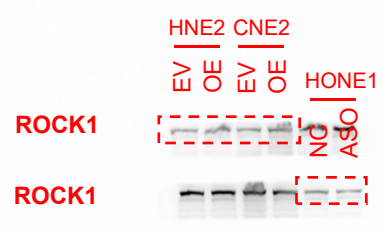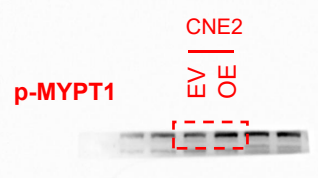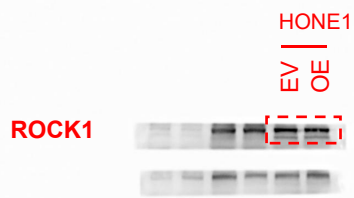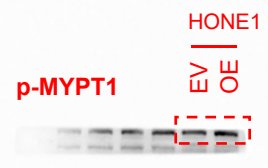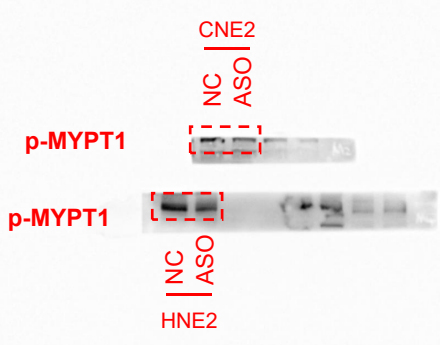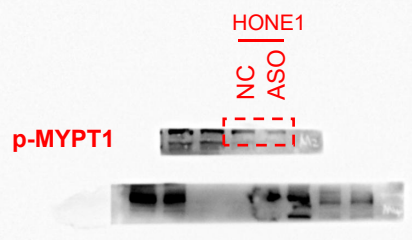



**Fig. 6E**

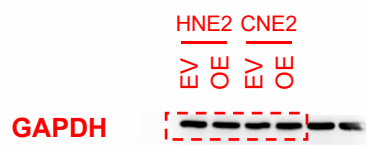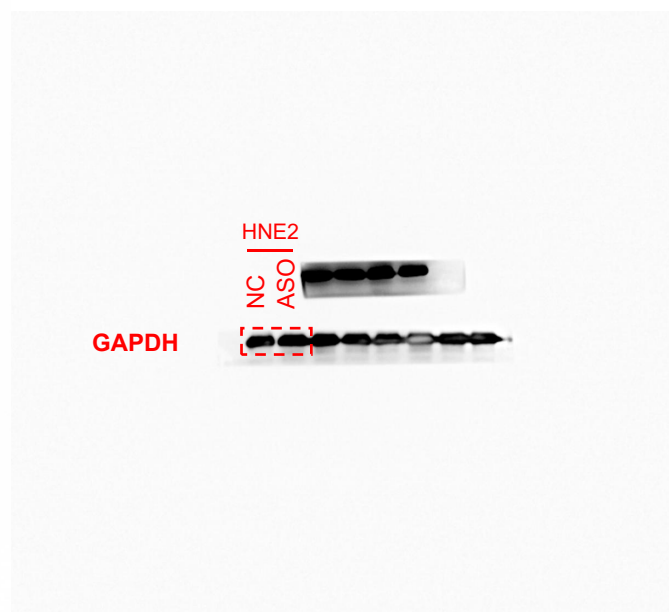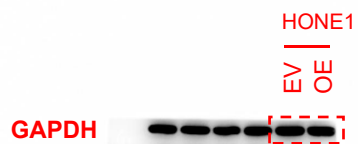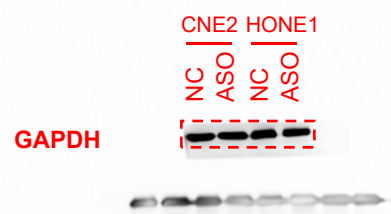

**Fig. 6F**

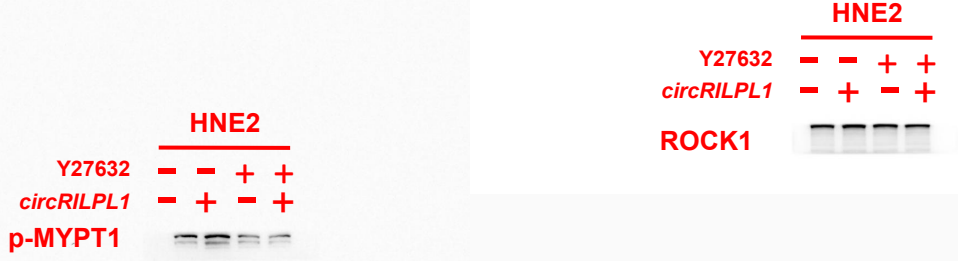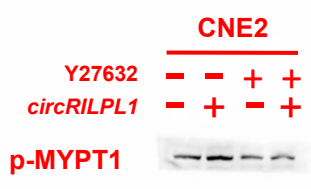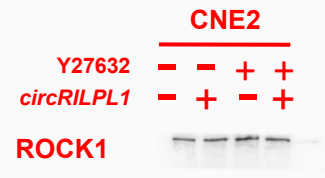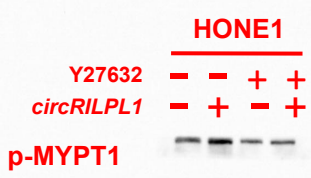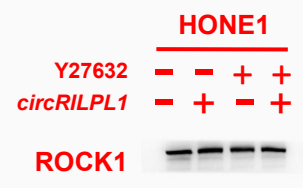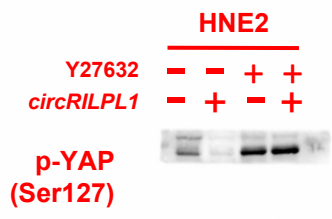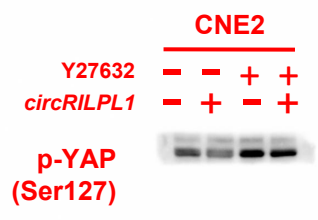

**Fig. 6F**

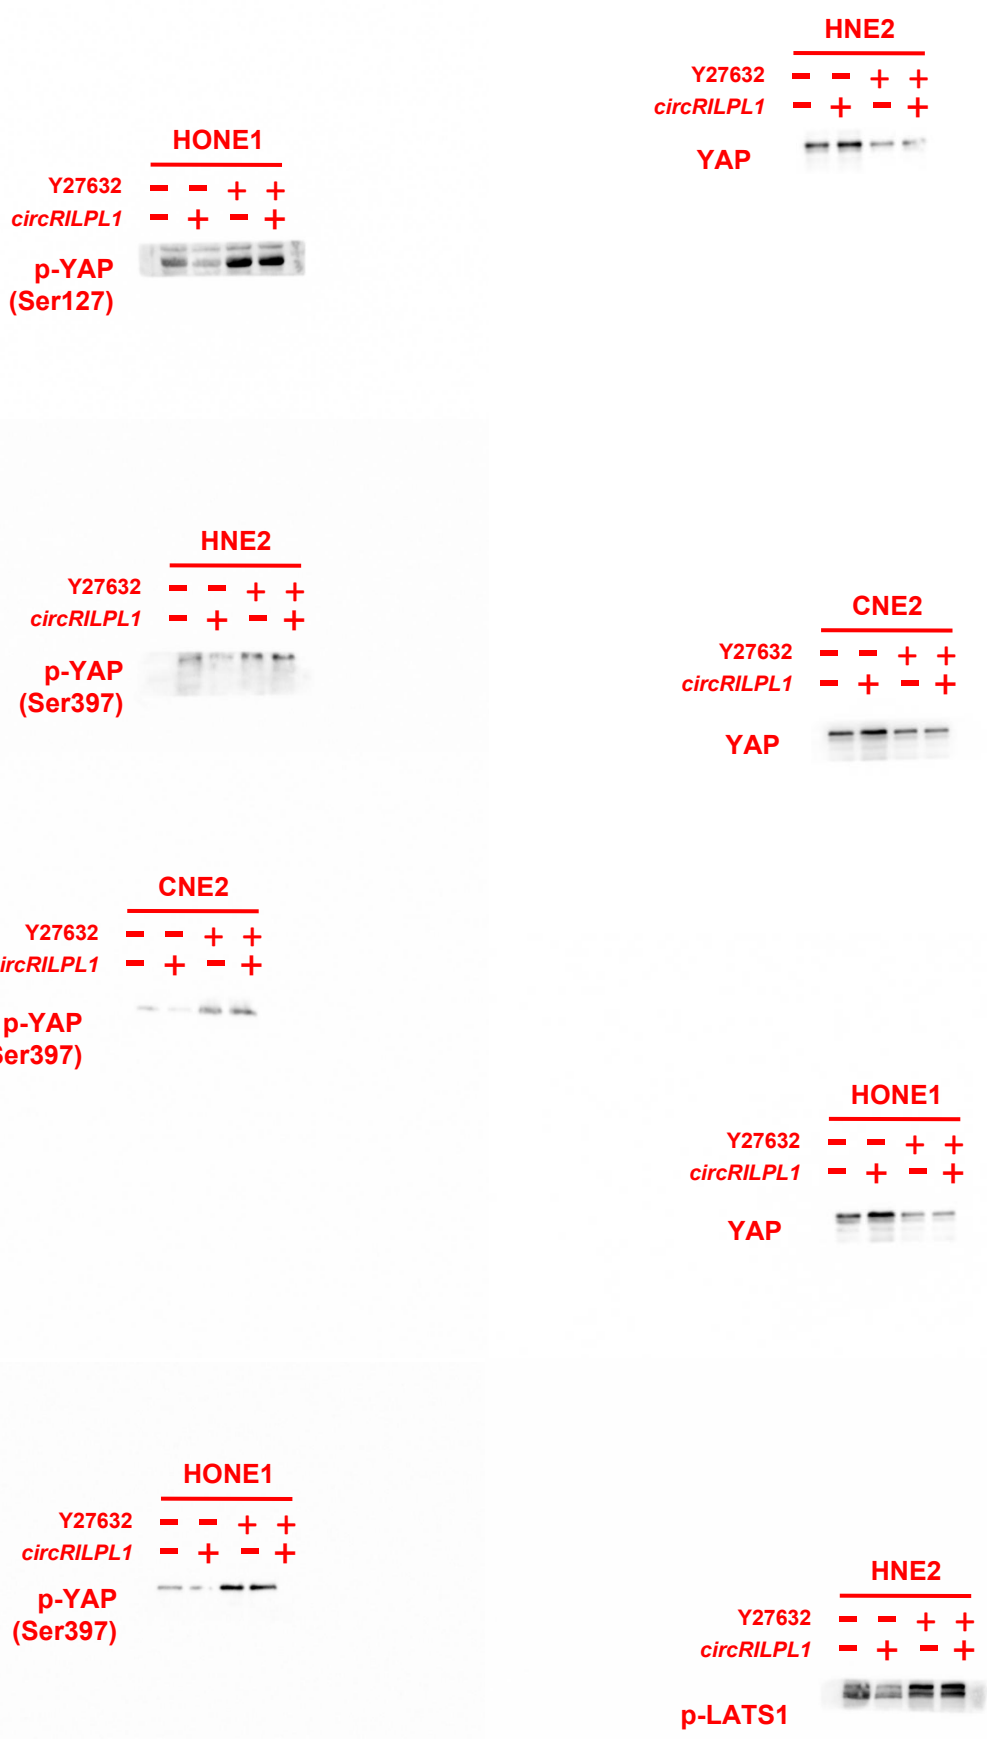

**Fig. 6F**

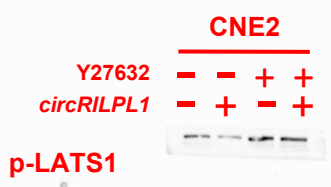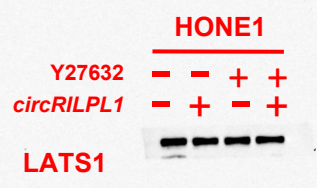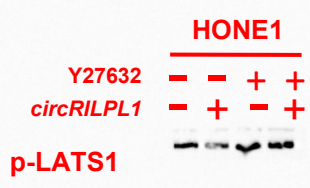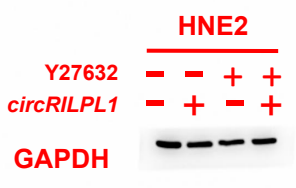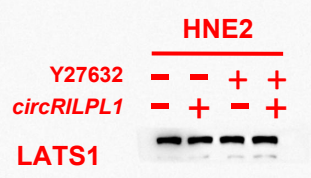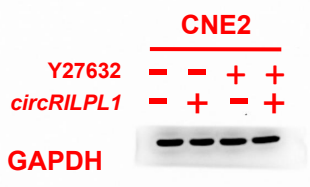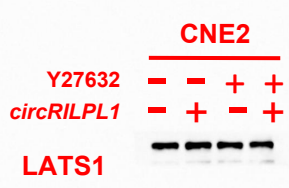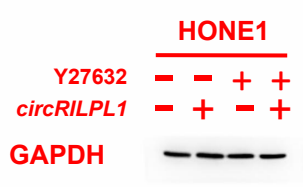

**Fig. 6G**

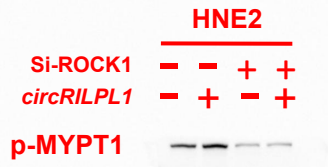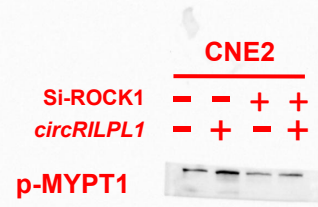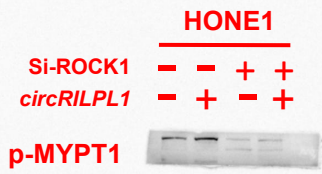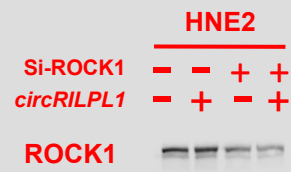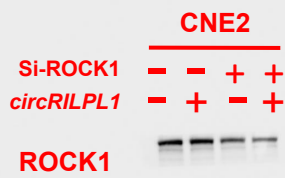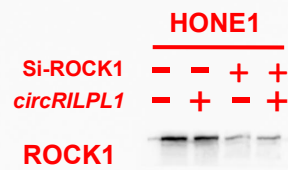

**Fig. 6G**

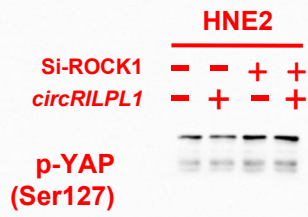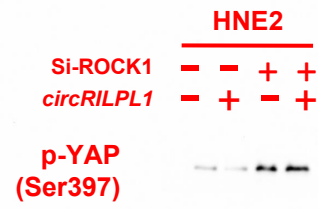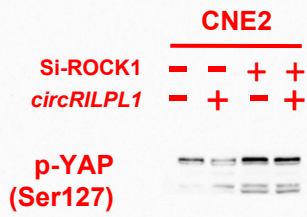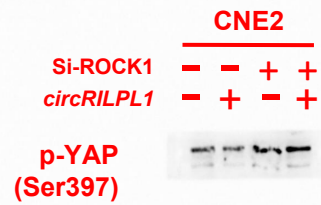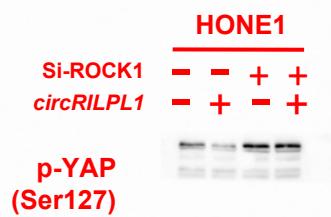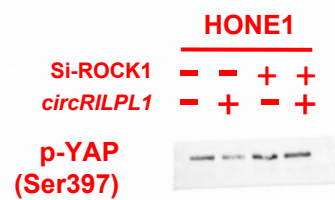

**Fig. 6G**

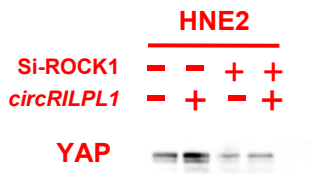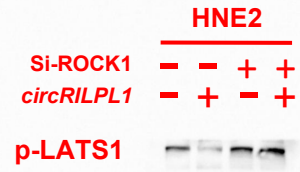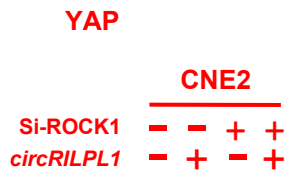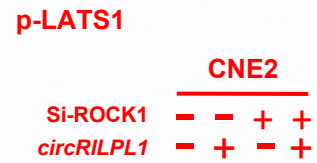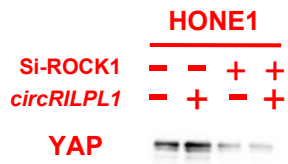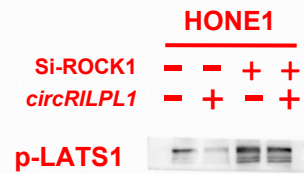

**Fig. 6G**

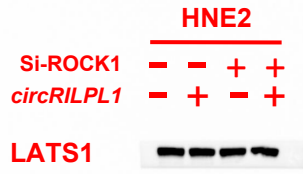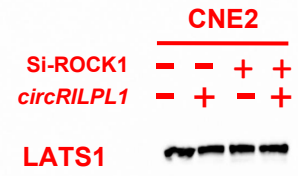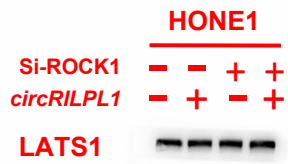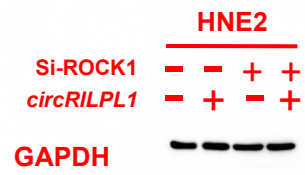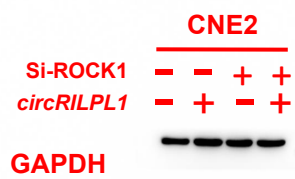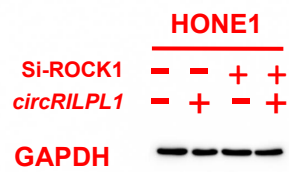



**Fig. S8A**

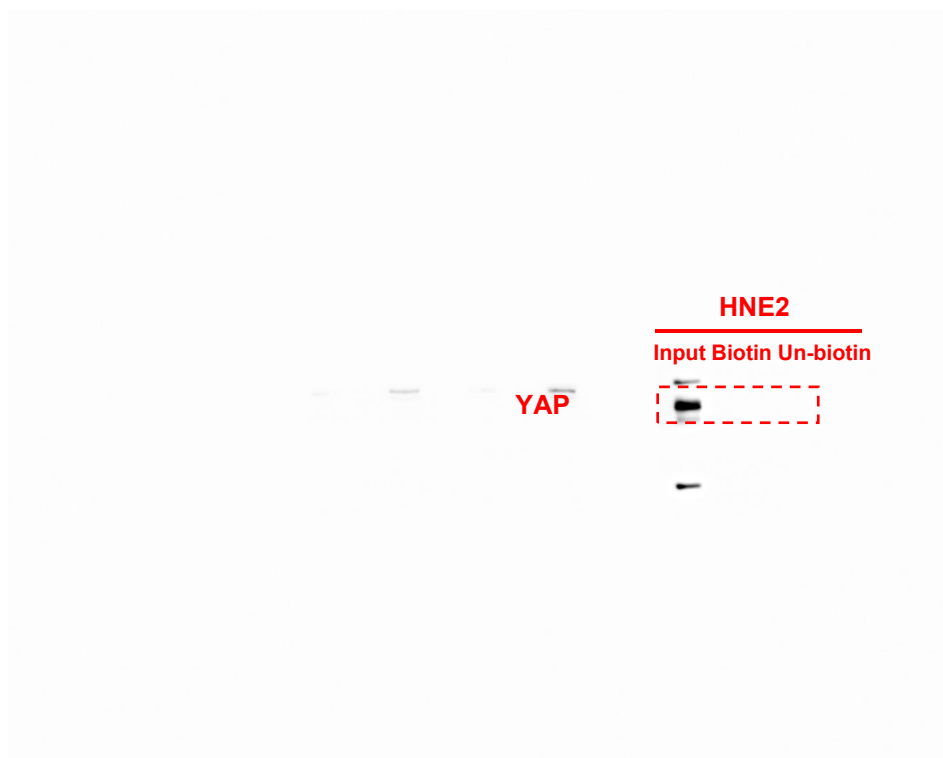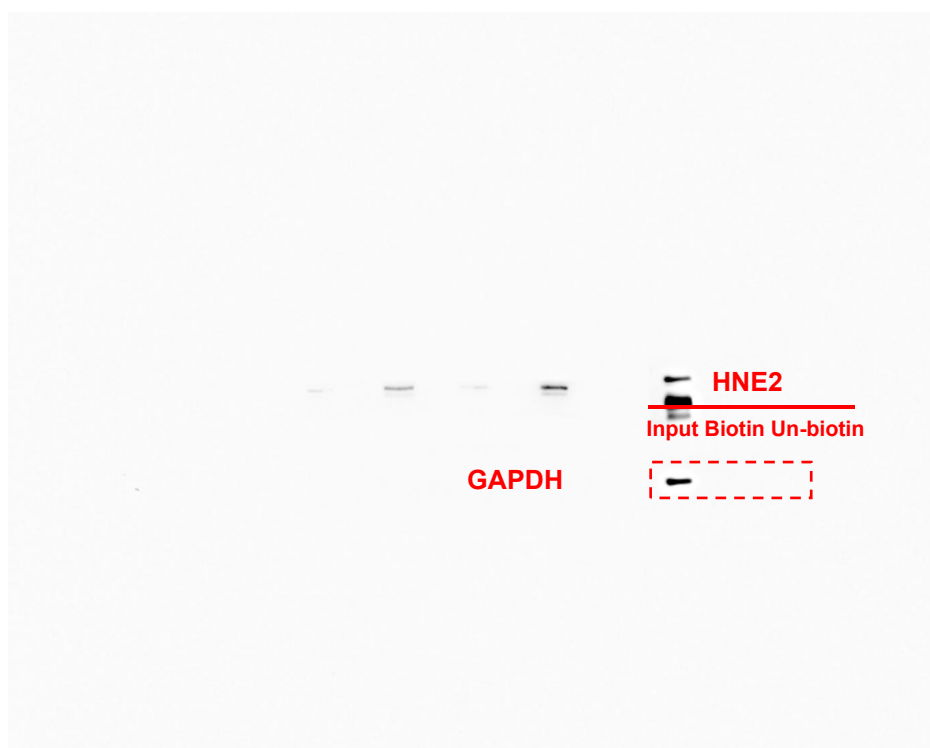

**Fig. S8B**

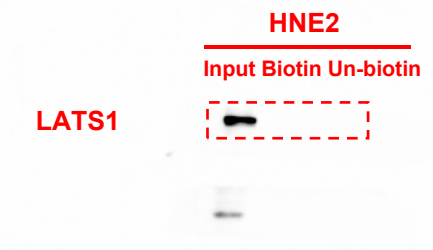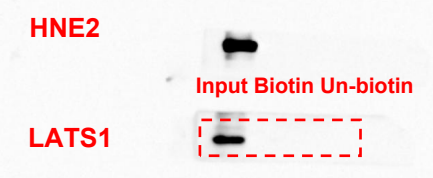

**Fig. S8D**

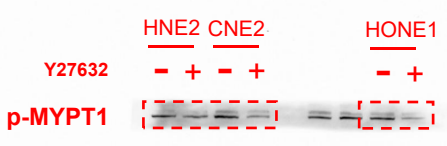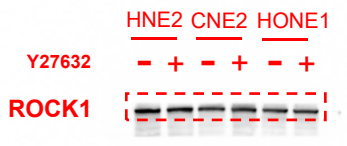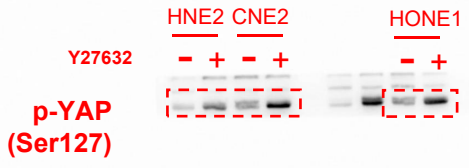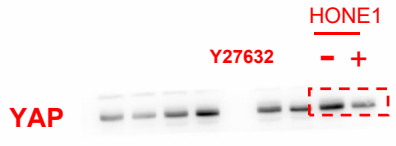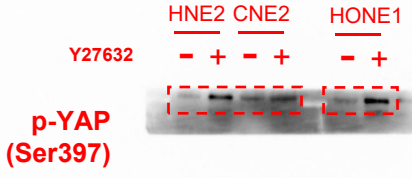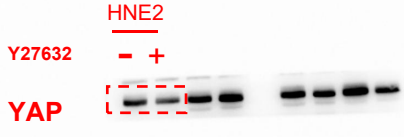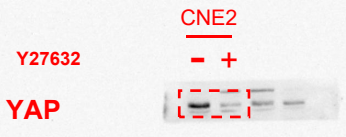

**Fig. S8D**

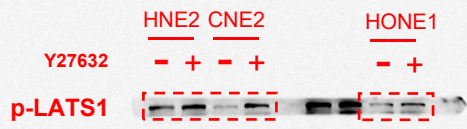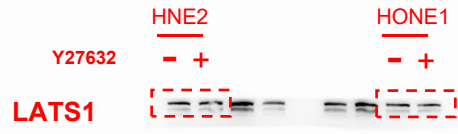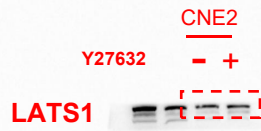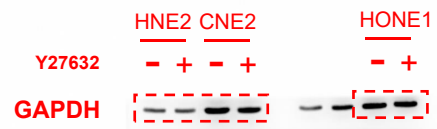

**Fig. S8E**

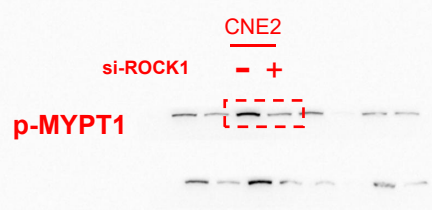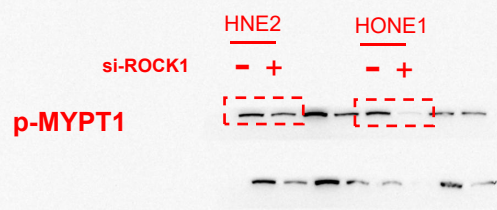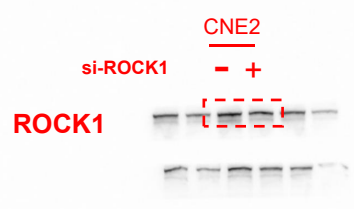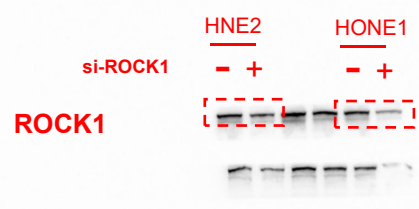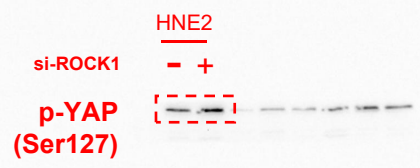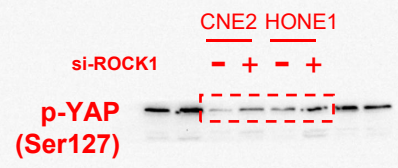

**Fig. S8E**

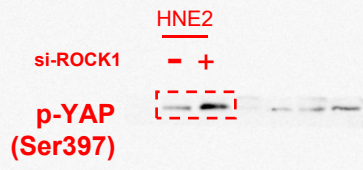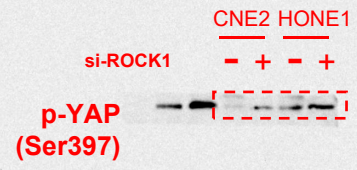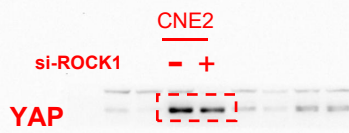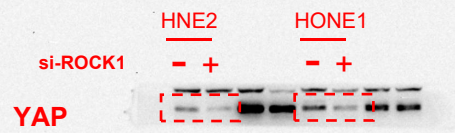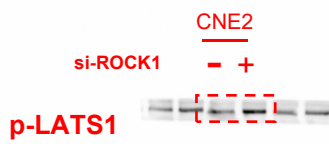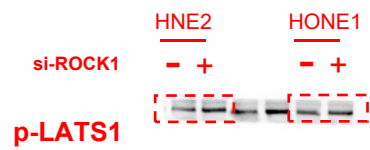

**Fig. S8E**

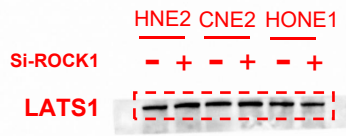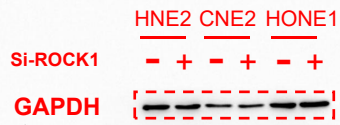



**Fig. 7A**

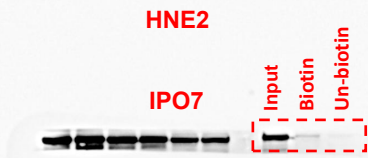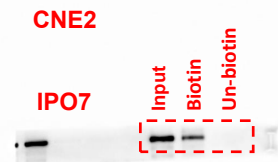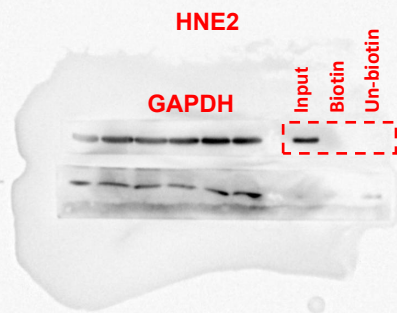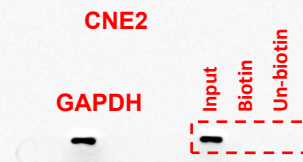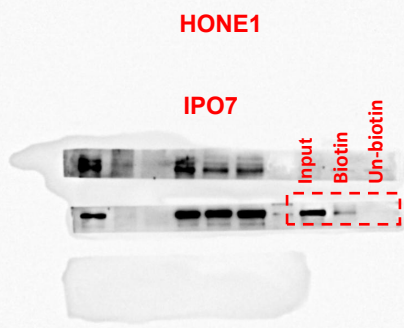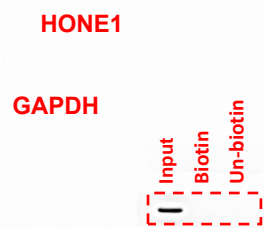



**Fig. 7C**

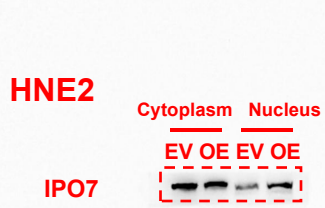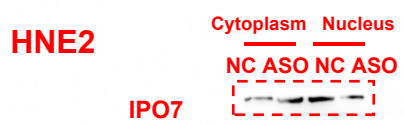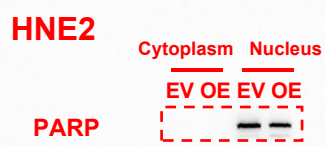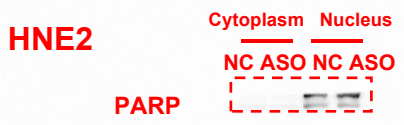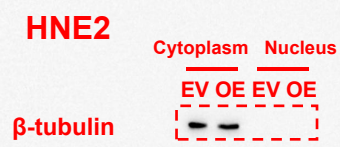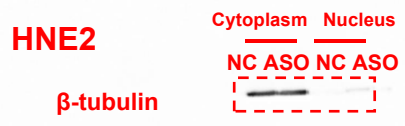

**Fig. 7C**

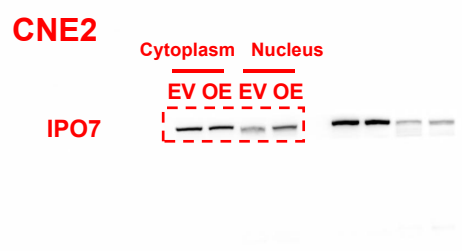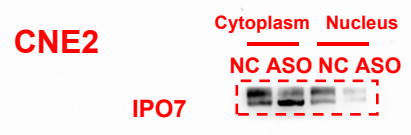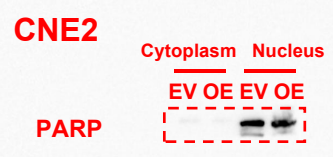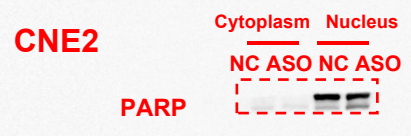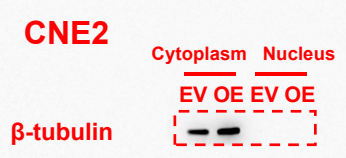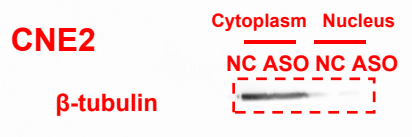

**Fig. 7C**

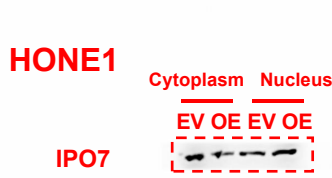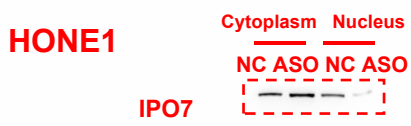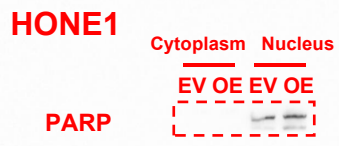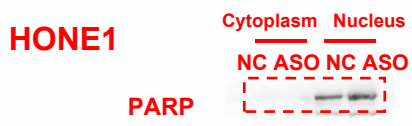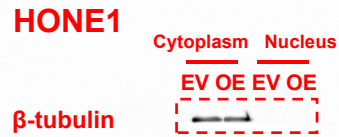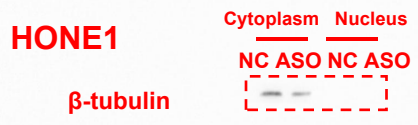

**Fig. 7E**

**HNE2**

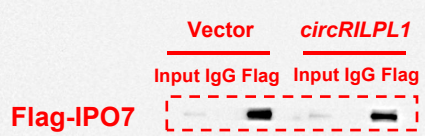

**CNE2**

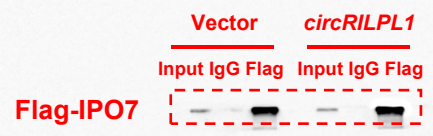

**HNE2**

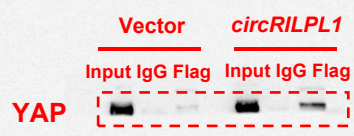

**CNE2**

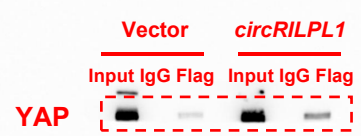

**HNE2**

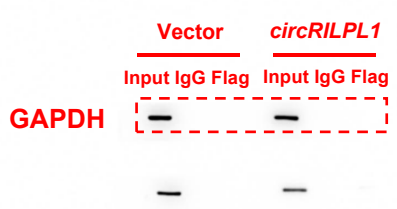

**CNE2**

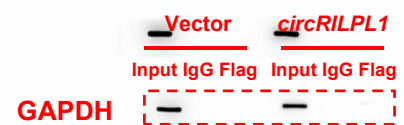

Fig. 7E

HONE1

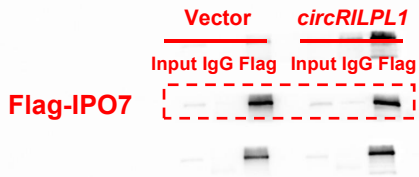

Fig. 7G

HNE2

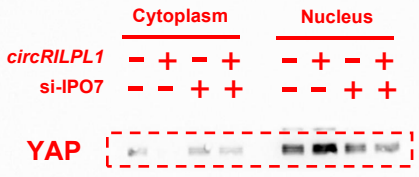

HONE1

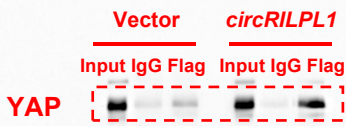

HNE2

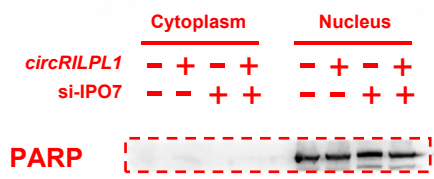

HONE1

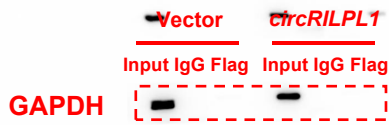

HNE2

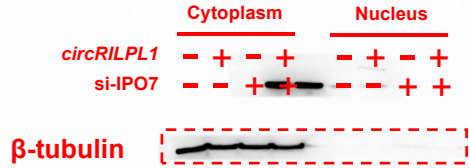



Fig. 7G

### CNE2

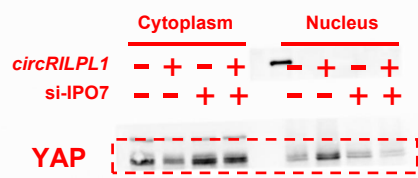

### HONE1

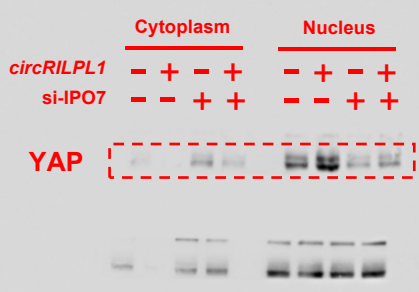

### CNE2

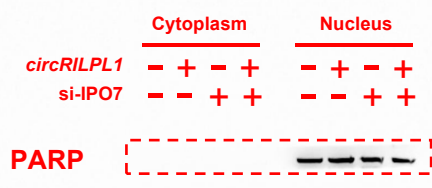

### HONE1

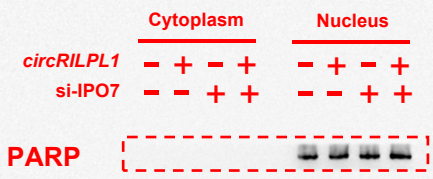

### CNE2

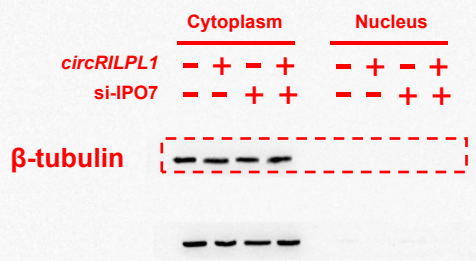

### HONE1

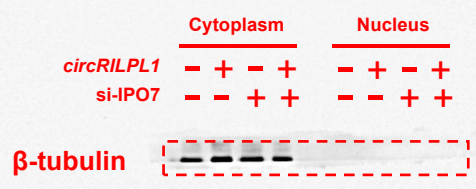

Fig. 7H

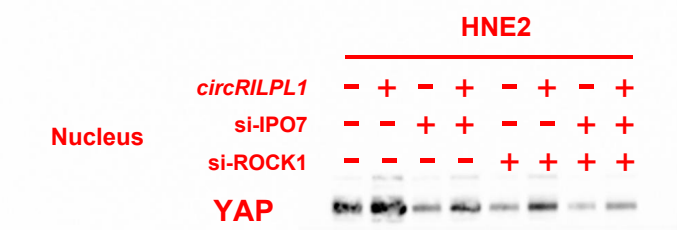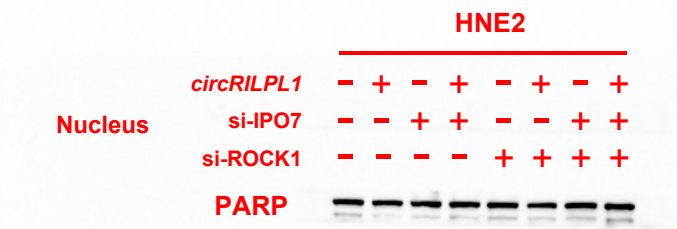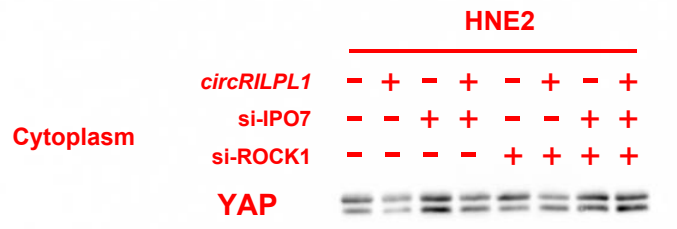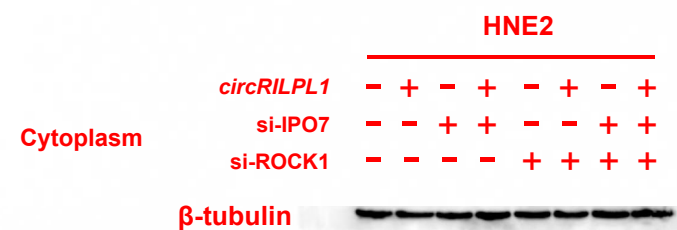

**Fig. S9B**

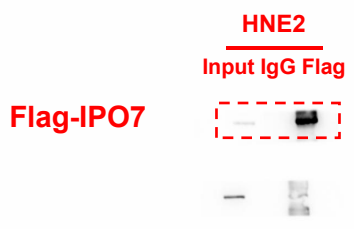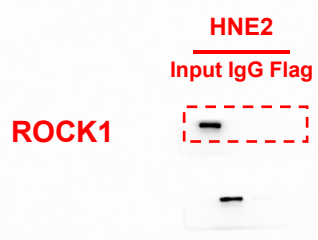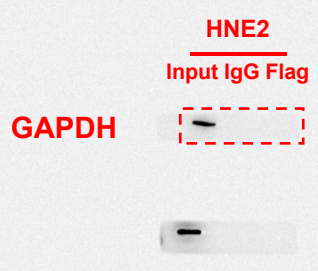

**Fig. S9E**

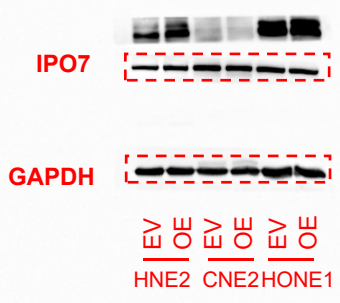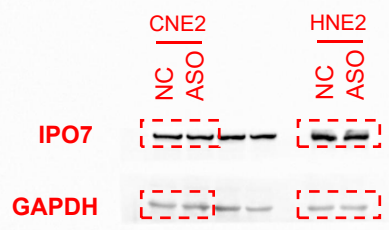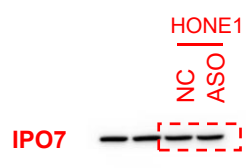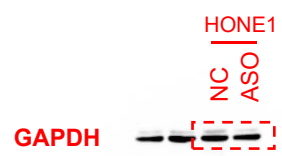



**Fig. S9F**

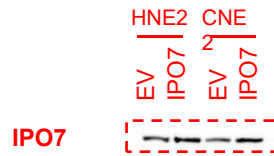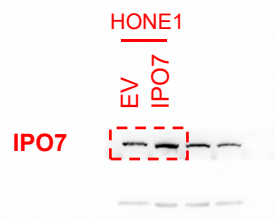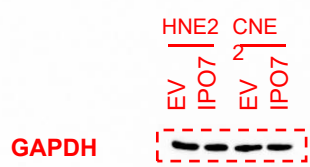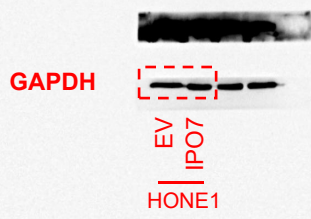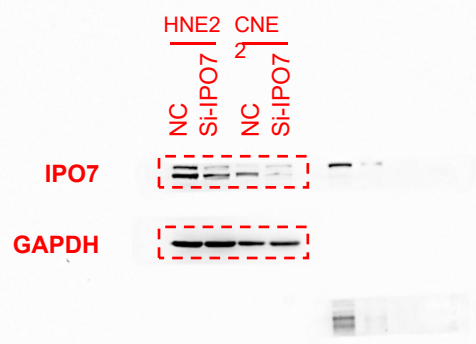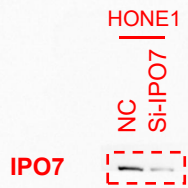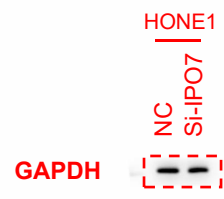

**Fig. S9G**

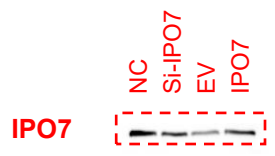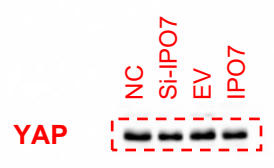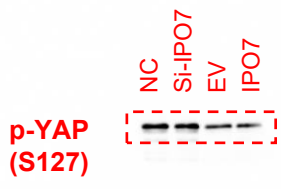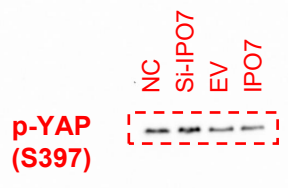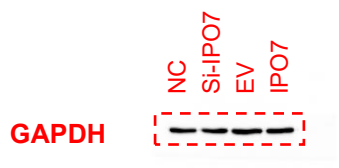

**Fig. S10C**

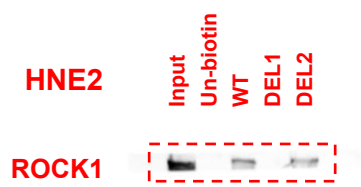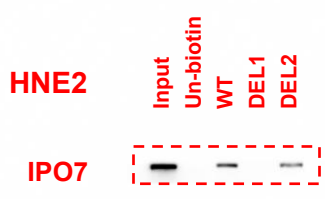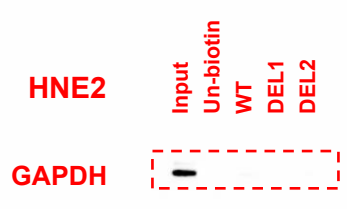

**Fig. S10C**

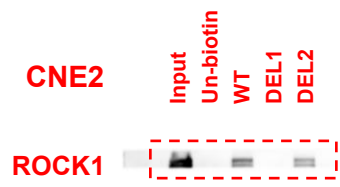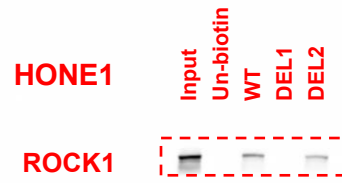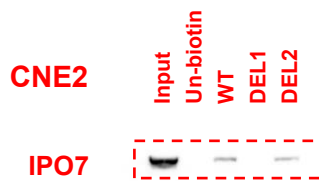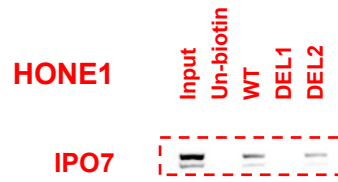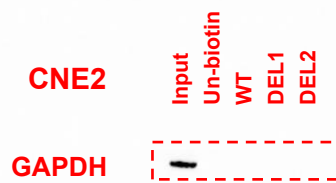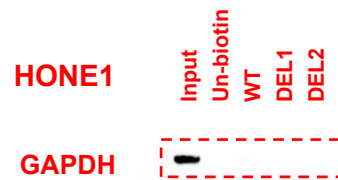

**Fig. 8B**

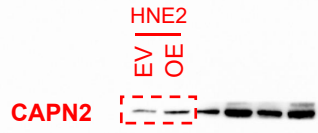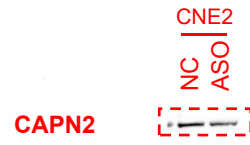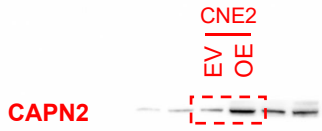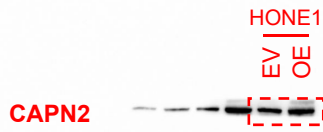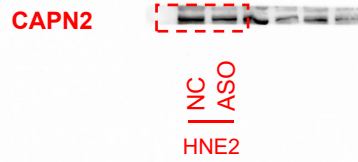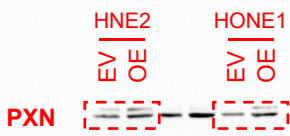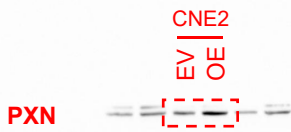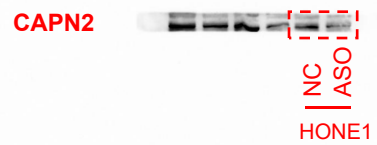

**Fig. 8B**

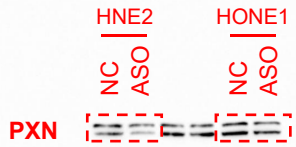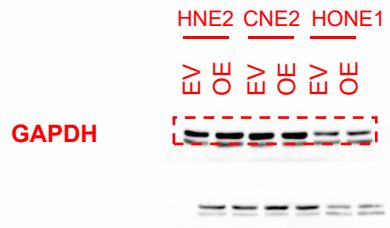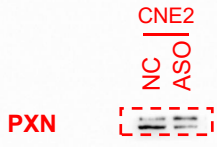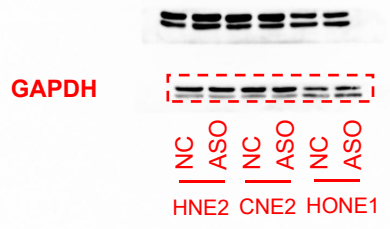

**Fig. S11A**

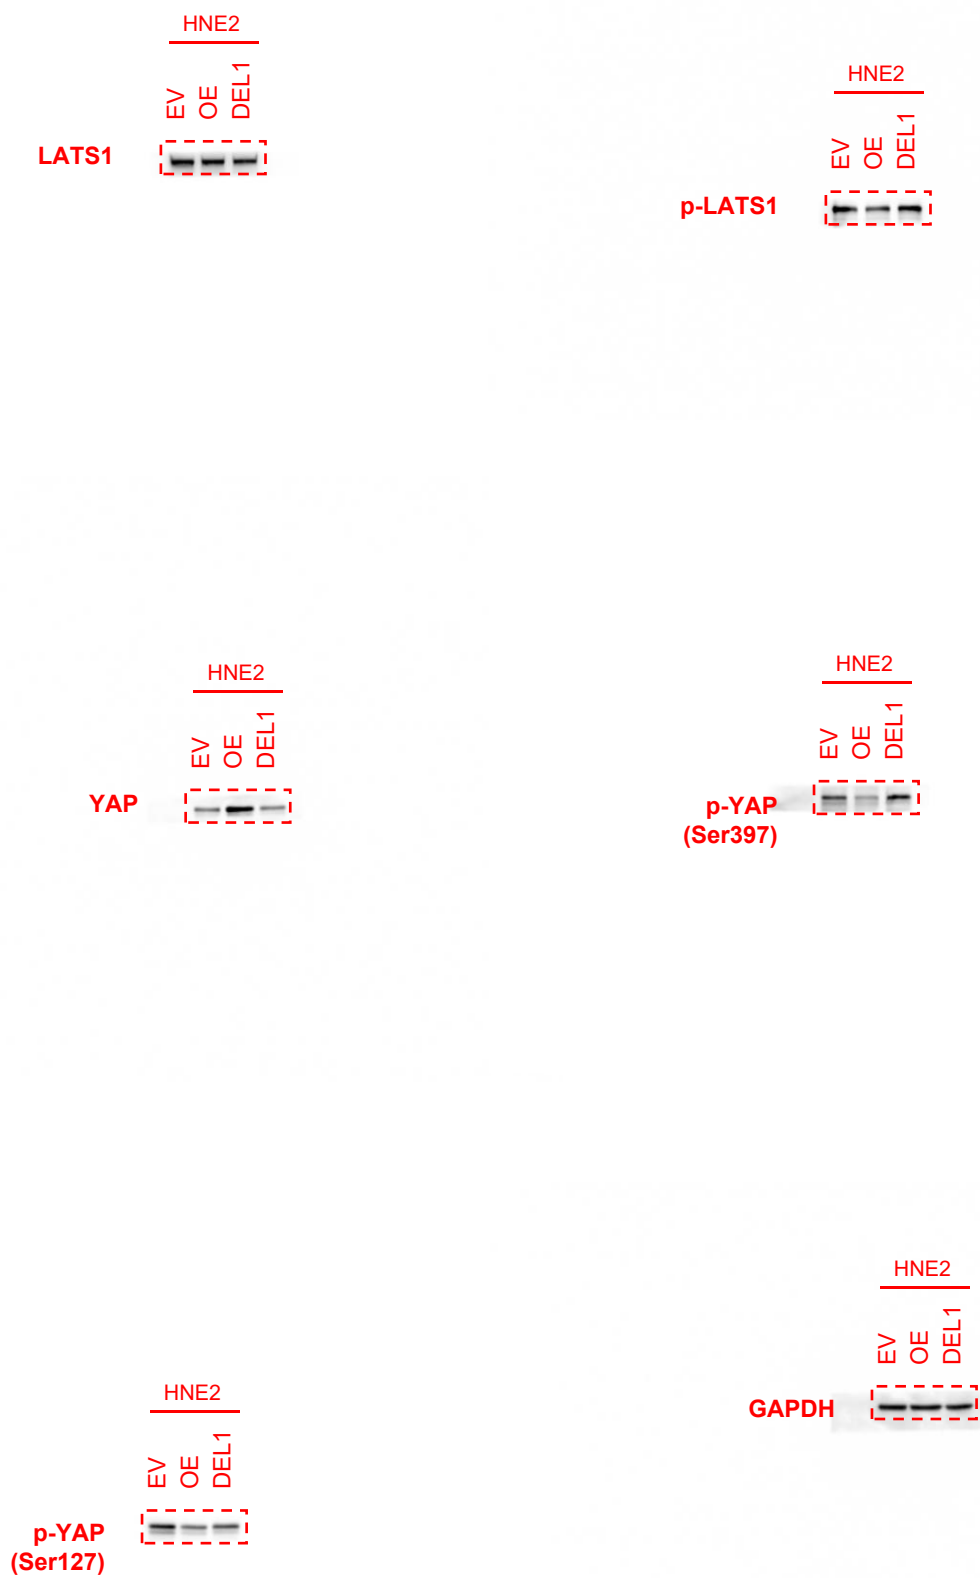

**Fig. S11B**

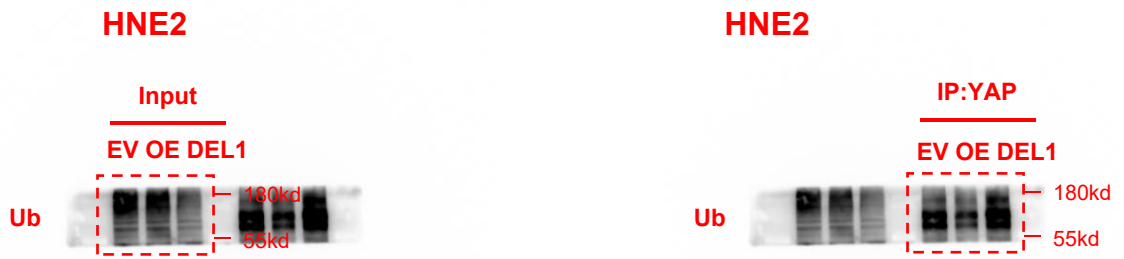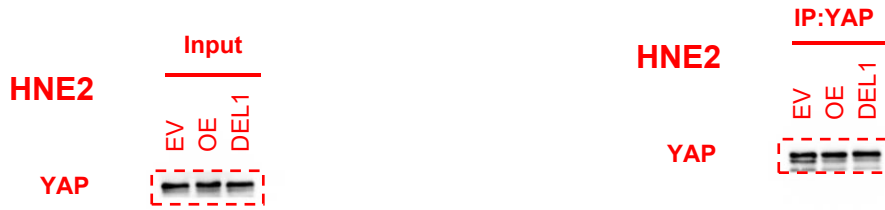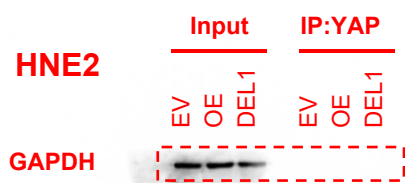



**Fig. S11C**

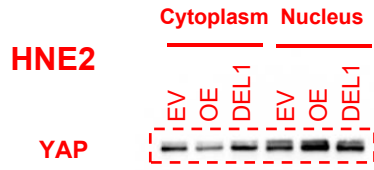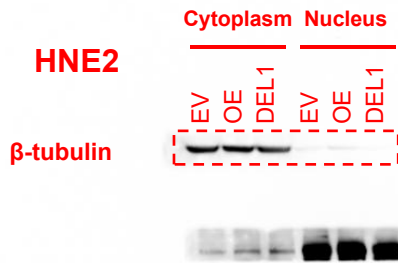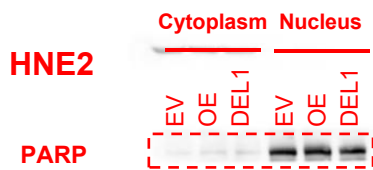

**Fig. S11D**

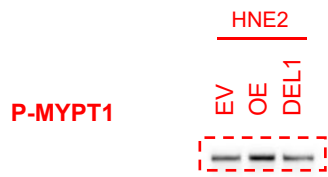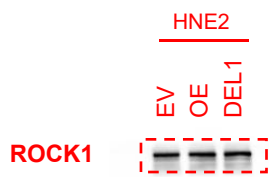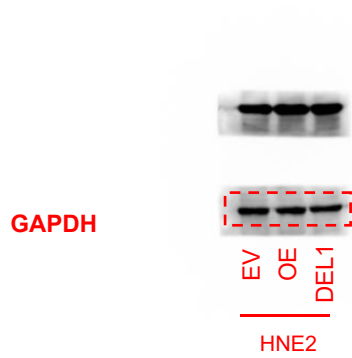

Supplement: 41418_2023_1171_MOESM11_ESM.pdf [file 41418_2023_1171_MOESM11_ESM.pdf]
